# Supplementary material
Source: publisher figshare collection journal article supplement (https://springernature.figshare.com/ndownloader/files/13814429)
Supplement: Supplementary file 1 [file 13814429]

## Sheet: Sheet1
SGA	0.55
SGA	0.62
SGA	0.18
SGA	5.72
SGA	0.82
SGA	0.43
SGA	6.85
SGA	0.38
SGA	1.01
SGA	0
SGA	1.6
SGA	0.53
SGA	1.57
SGA	3.34
SGA	0.83
SGA	5.21
SGA	1.74
SGA	1.19
SGA	8.01
AGA	1.46
AGA	0.79
AGA	1.2
AGA	0.82
AGA	2.23
AGA	2.02
AGA	0.06
AGA	3.77
AGA	0.87
AGA	0.72
AGA	1.23
AGA	5.14
AGA	13.87
AGA	0.15
AGA	0.35
AGA	0.98
AGA	1.24
AGA	0.01
AGA	0.05
AGA	2.66
AGA	9.03
AGA	2.05
AGA	0.5
AGA	2.62
AGA	0.27
AGA	0.11
AGA	0.15
AGA	3.14
AGA	2.47
AGA	1.24
AGA	0.02
AGA	2.33
AGA	1.45
AGA	1.19
AGA	0.63
AGA	1.03
AGA	1.01
AGA	0.04
AGA	0.87
AGA	0.18
AGA	0.69
AGA	0.48
AGA	1.48
AGA	0.14
AGA	0.43
AGA	15.18
AGA	1.43
AGA	3.97
AGA	0.01
AGA	0.86
AGA	0.46
AGA	4.2
AGA	0.77
AGA	0.91
AGA	2.84
AGA	0.5
AGA	1.37
AGA	1.51
AGA	0.41
AGA	5.53
AGA	6.37
AGA	0.48
AGA	13.69
AGA	0.7
AGA	1.37
AGA	3.06
AGA	4.96
AGA	5.26
AGA	0.46
AGA	3.48
AGA	0.04
AGA	1.33
AGA	0.4
AGA	1.5
AGA	0.15
AGA	0.84
AGA	2.12
AGA	7.82
AGA	0.74
AGA	0.64
AGA	1.43
AGA	0.83
AGA	0.04
AGA	0.31
AGA	2.24
AGA	0.59
AGA	3.19
AGA	0.63
AGA	2.49
AGA	0.18
AGA	0
AGA	1.75
AGA	0.6
AGA	0.02
AGA	0.1
AGA	0.99
AGA	0.81
AGA	0.75
AGA	4.64
AGA	0.1
AGA	0.74
AGA	0.12
AGA	5.38
AGA	0.03
AGA	11
AGA	0.01
AGA	0.03
AGA	3.03
AGA	6.53
AGA	0.27
AGA	1.6
AGA	1.26
AGA	2.34
AGA	4.14
AGA	3.41
AGA	1.29
AGA	2.33
AGA	4.56
AGA	1.03
AGA	12.13
AGA	0.4
AGA	0.77
AGA	1.19
AGA	5.72
AGA	0.7
AGA	0.29
AGA	1.9
AGA	0.51
AGA	0.69
AGA	1.18
AGA	2.11
AGA	1.01
AGA	0.82
AGA	0.37
AGA	1.74
AGA	1.17
AGA	0.82
AGA	0.41
AGA	0.95
AGA	1.38
AGA	4.62
AGA	11.58
AGA	1.21
AGA	1.11
AGA	0.45
AGA	0.03
AGA	1.91
AGA	0.25
AGA	0.82
AGA	0.3
AGA	0.93
AGA	0.05
AGA	0.11
AGA	0.35
AGA	1.45
AGA	1.42
AGA	2.02
AGA	1.68
AGA	3.12
AGA	0.45
AGA	0.26
AGA	6.01
AGA	0.2
AGA	0.02
AGA	0.26
AGA	8.74
AGA	0.47
AGA	3.04
AGA	0.07
AGA	1.87
AGA	0.12
AGA	0.8
AGA	17.2
AGA	0.47
AGA	0.27
AGA	4.25
AGA	0.31
AGA	3.59
AGA	0
AGA	0.49
AGA	0.51
AGA	0.65
AGA	0.13
AGA	0.12
AGA	0.8
AGA	0.59
AGA	0.97
AGA	15.86
AGA	0.01
AGA	5.66
AGA	0.98
AGA	1.49
AGA	1.06
AGA	4.33
AGA	3.41
AGA	2.13
AGA	0.77
AGA	8.93
AGA	2.12
AGA	0.68
AGA	0.34
AGA	2.33
AGA	0.12
AGA	4.52
AGA	0.1
AGA	11.66
AGA	4.8
AGA	2.17
AGA	0.92
AGA	1.69
AGA	1.17
AGA	1.08
AGA	3.89
AGA	1.49
AGA	7.88
AGA	0.41
AGA	0.08
AGA	0.74
AGA	3.07
AGA	0
AGA	0.03
AGA	2.18
AGA	7.32
AGA	6.1
AGA	1.15
AGA	0.4
AGA	0.56
AGA	2.5
AGA	0.76
AGA	9.16
AGA	0
AGA	0
AGA	10.25
AGA	1.9
AGA	0.01
AGA	4.66
AGA	1.7
AGA	1.34
LGA	1.15
LGA	0.64
LGA	2.46
LGA	0.81
LGA	2.09
LGA	6.59
LGA	1.21
LGA	8.18
LGA	1.01
LGA	1.67
LGA	2.03
LGA	2.25
LGA	1.58
LGA	2.27
LGA	8.2
LGA	0.62
LGA	0.85
